# Supplementary material
Source: PubMed Central journal article supplement (PMC3977150)

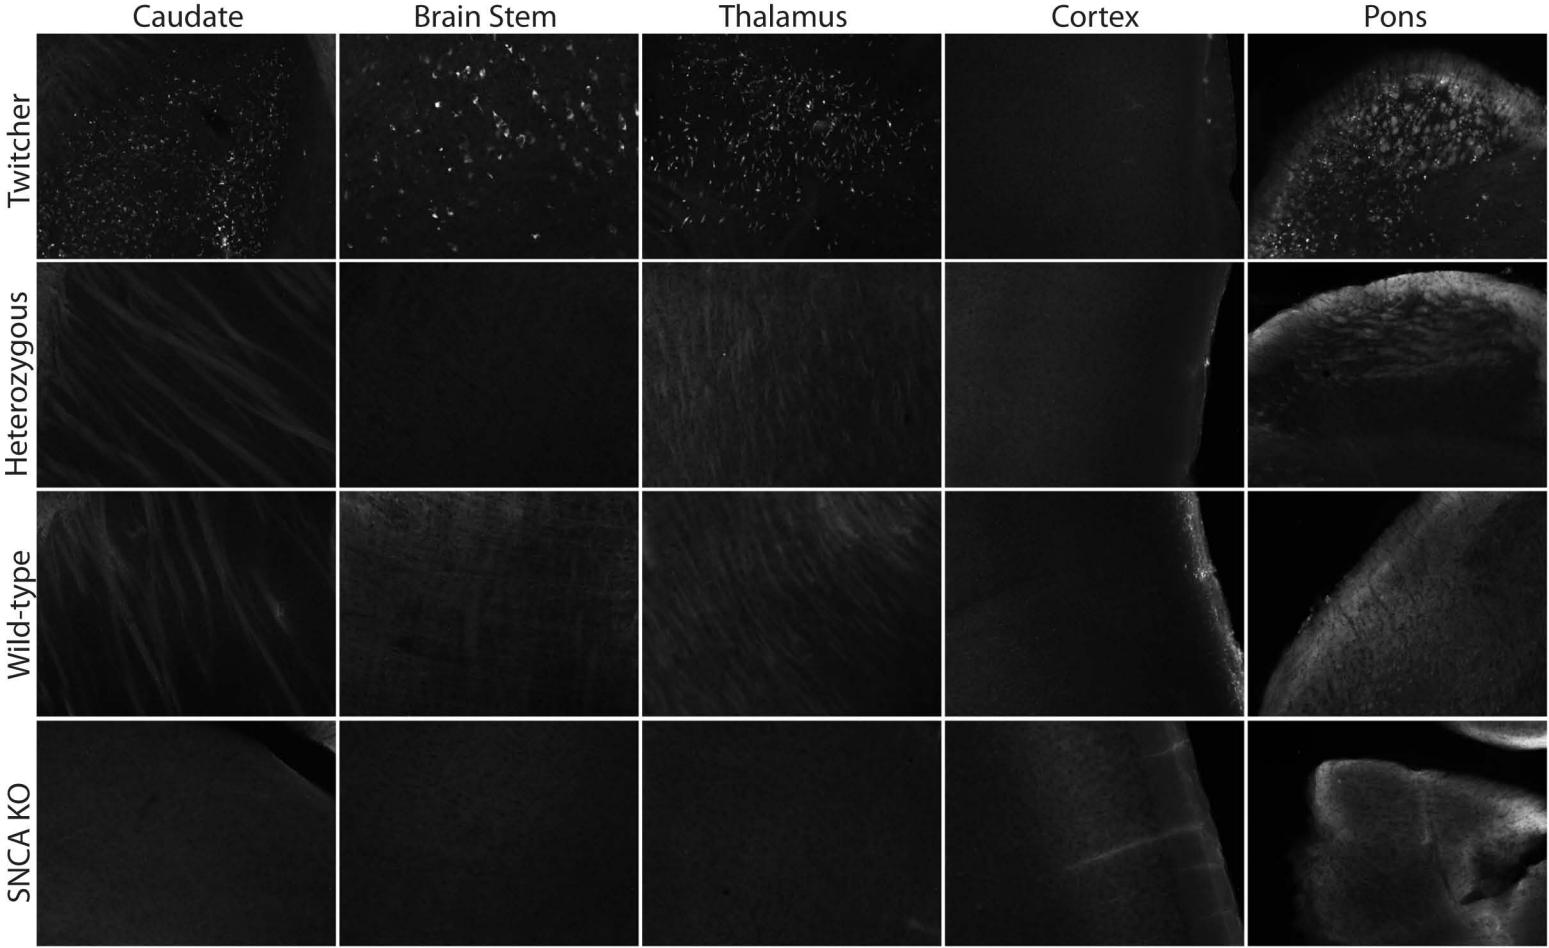

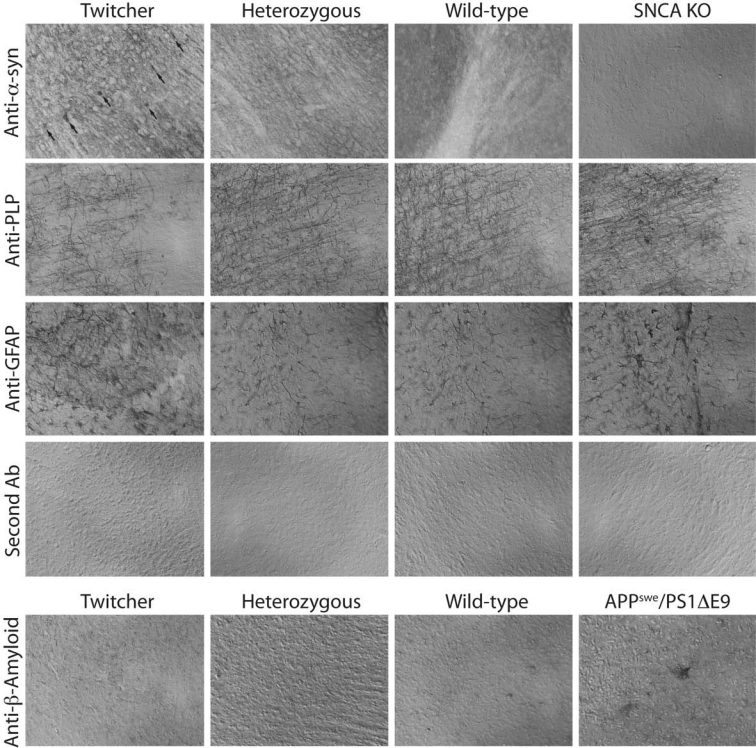

**A****ubiquitin**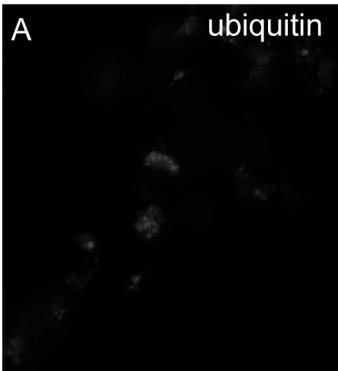**B****Thio-S**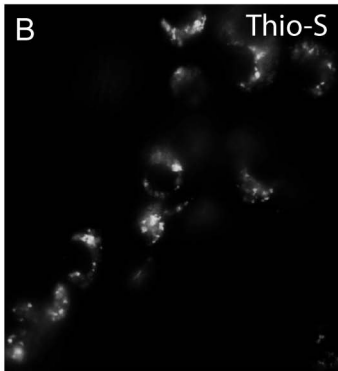

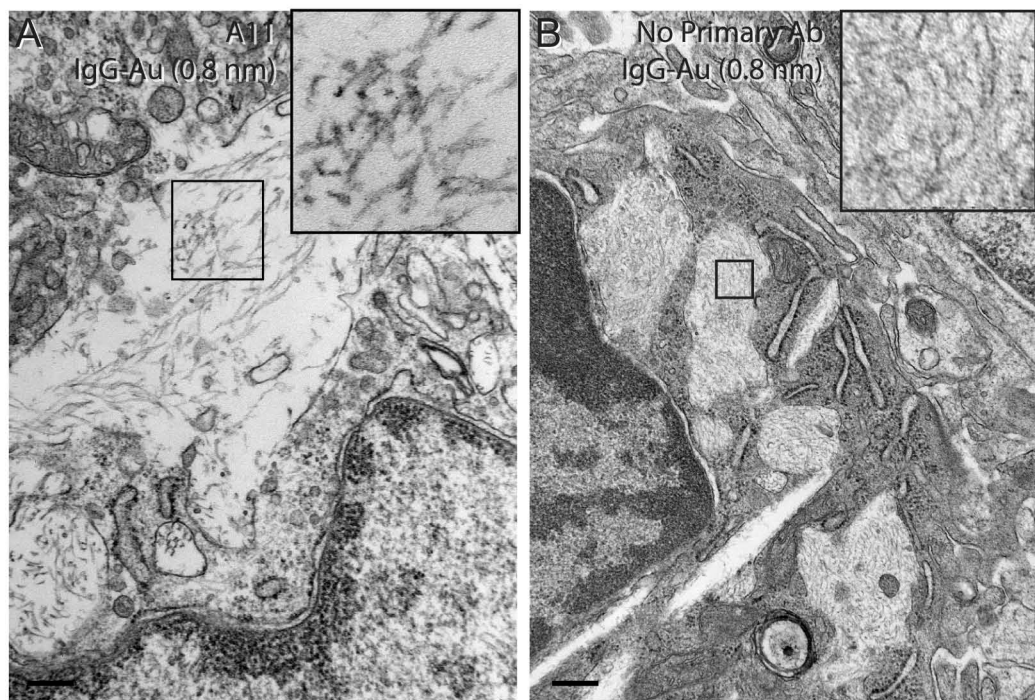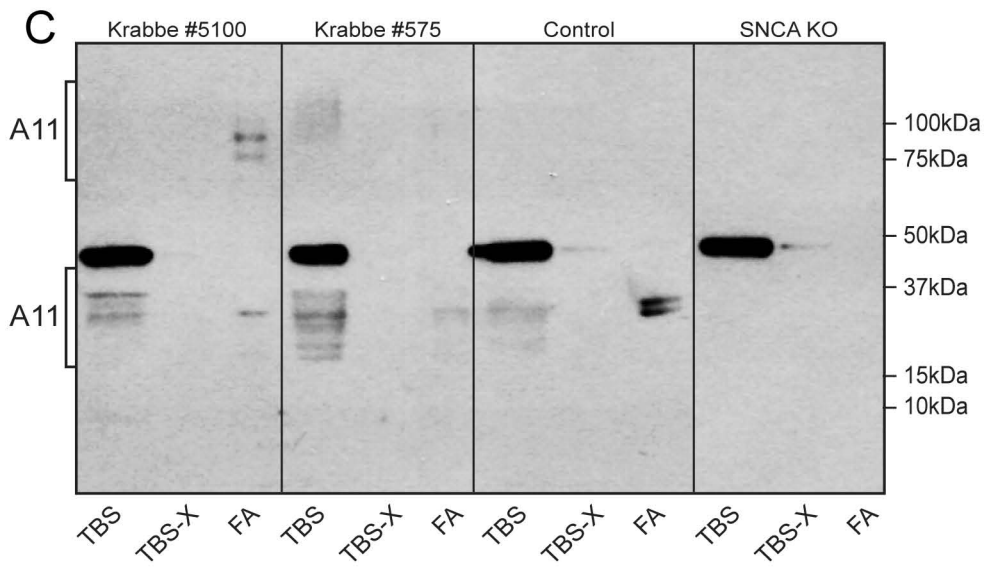

Supplement: NIHMS558173-supplement-Supp_Fig_S1-S4.pdf [file NIHMS558173-supplement-Supp_Fig_S1-S4.pdf]
